# Supplementary material
Source: ML conference proceedings conference paper supplement (https://proceedings.mlr.press/v37/csiba15.html)
Supplement: Supplementary file [file csiba15-supp.pdf]

---

## Stochastic Dual Coordinate Ascent with Adaptive Probabilities: Supplementary material

---

### Proofs

We shall need the following inequality.

**Lemma 1.** *Function  $f : \mathbb{R}^n \rightarrow \mathbb{R}$  defined in (3) satisfies the following inequality:*

$$f(\alpha + h) \leq f(\alpha) + \langle \nabla f(\alpha), h \rangle + \frac{1}{2\lambda n^2} h^\top A^\top A h, \quad (1)$$

holds for  $\forall \alpha, h \in \mathbb{R}^n$ .

*Proof.* Since  $g$  is 1-strongly convex,  $g^*$  is 1-smooth. Pick  $\alpha, h \in \mathbb{R}^n$ . Since,  $f(\alpha) = \lambda g^*(\frac{1}{\lambda n} A \alpha)$ , we have

$$\begin{aligned} f(\alpha + h) &= \lambda g^*\left(\frac{1}{\lambda n} A \alpha + \frac{1}{\lambda n} A h\right) \\ &\leq \lambda \left( g^*\left(\frac{1}{\lambda n} A \alpha\right) + \langle \nabla g^*\left(\frac{1}{\lambda n} A \alpha\right), \frac{1}{\lambda n} A h \rangle + \frac{1}{2} \left\| \frac{1}{\lambda n} A h \right\|^2 \right) \\ &= f(\alpha) + \langle \nabla f(\alpha), h \rangle + \frac{1}{2\lambda n^2} h^\top A^\top A h. \end{aligned}$$

□

*Proof of Lemma 3.* It can be easily checked that the following relations hold

$$\nabla_i f(\alpha^t) = \frac{1}{n} A_i^\top w^t, \quad \forall t \geq 0, \quad i \in [n], \quad (2)$$

$$g(w^t) + g^*(\bar{\alpha}^t) = \langle w^t, \bar{\alpha}^t \rangle, \quad \forall t \geq 0, \quad (3)$$

where  $\{w^t, \alpha^t, \bar{\alpha}^t\}_{t \geq 0}$  is the output sequence of Algorithm 1. Let  $t \geq 0$  and  $\theta \in [0, \min_i p_i^t]$ . For each  $i \in [n]$ , since  $\phi_i$  is  $1/\gamma$ -smooth,  $\phi_i^*$  is  $\gamma$ -strongly convex and thus for arbitrary  $s_i \in [0, 1]$ ,

$$\begin{aligned} &\phi_i^*(-\alpha_i^t + s_i \kappa_i^t) \\ &= \phi_i^*((1 - s_i)(-\alpha_i^t) + s_i \nabla \phi_i(A_i^\top w^t)) \\ &\leq (1 - s_i) \phi_i^*(-\alpha_i^t) + s_i \phi_i^*(\nabla \phi_i(A_i^\top w^t)) \\ &\quad - \frac{\gamma s_i (1 - s_i) |\kappa_i^t|^2}{2}. \end{aligned} \quad (4)$$

We have:

$$\begin{aligned} &f(\alpha^{t+1}) - f(\alpha^t) \\ &\stackrel{(1)}{\leq} \langle \nabla f(\alpha^t), \alpha^{t+1} - \alpha^t \rangle \\ &\quad + \frac{1}{2\lambda n^2} \langle \alpha^{t+1} - \alpha^t, A^\top A (\alpha^{t+1} - \alpha^t) \rangle \\ &= \nabla_i f(\alpha^t) \Delta \alpha_{i_t}^t + \frac{v_i}{2\lambda n^2} |\Delta \alpha_{i_t}^t|^2 \\ &\stackrel{(2)}{=} \frac{1}{n} A_i^\top w^t \Delta \alpha_{i_t}^t + \frac{v_i}{2\lambda n^2} |\Delta \alpha_{i_t}^t|^2 \end{aligned} \quad (5)$$

Thus,

$$\begin{aligned} &D(\alpha^{t+1}) - D(\alpha^t) \\ &\stackrel{(5)}{\geq} -\frac{1}{n} A_i^\top w^t \Delta \alpha_{i_t}^t - \frac{v_{i_t}}{2\lambda n^2} |\Delta \alpha_{i_t}^t|^2 + \frac{1}{n} \sum_{i=1}^n \phi_i^*(-\alpha_i^t) \\ &\quad - \frac{1}{n} \sum_{i=1}^n \phi_i^*(-\alpha_i^{t+1}) \\ &= -\frac{1}{n} A_i^\top w^t \Delta \alpha_{i_t}^t - \frac{v_{i_t}}{2\lambda n^2} |\Delta \alpha_{i_t}^t|^2 + \frac{1}{n} \phi_{i_t}^*(-\alpha_{i_t}^t) \\ &\quad - \frac{1}{n} \phi_{i_t}^*(-(\alpha_{i_t}^t + \Delta \alpha_{i_t}^t)) \\ &= \max_{\Delta \in \mathbb{R}} -\frac{1}{n} A_i^\top w^t \Delta - \frac{v_{i_t}}{2\lambda n^2} |\Delta|^2 + \frac{1}{n} \phi_{i_t}^*(-\alpha_{i_t}^t) \\ &\quad - \frac{1}{n} \phi_{i_t}^*(-(\alpha_{i_t}^t + \Delta)), \end{aligned}$$

where the last equality follows from the definition of  $\Delta \alpha_{i_t}^t$  in Algorithm 1. Then by letting  $\Delta = -s_i \kappa_{i_t}^t$  for some arbitrary  $s_i \in [0, 1]$  we get:

$$\begin{aligned} &D(\alpha^{t+1}) - D(\alpha^t) \\ &\geq \frac{s_i A_i^\top w^t \kappa_{i_t}^t}{n} - \frac{s_i^2 v_{i_t} |\kappa_{i_t}^t|^2}{2\lambda n^2} + \frac{1}{n} \phi_{i_t}^*(-\alpha_{i_t}^t) \\ &\quad - \frac{1}{n} \phi_{i_t}^*(-\alpha_{i_t}^t + s_i \kappa_{i_t}^t) \\ &\stackrel{(4)}{\geq} \frac{s_i}{n} (\phi_{i_t}^*(-\alpha_{i_t}^t) - \phi_{i_t}^*(\nabla \phi_{i_t}(A_i^\top w^t)) + A_i^\top w^t \kappa_{i_t}^t) \\ &\quad - \frac{s_i^2 v_{i_t} |\kappa_{i_t}^t|^2}{2\lambda n^2} + \frac{\gamma s_i (1 - s_i) |\kappa_{i_t}^t|^2}{2n}. \end{aligned}$$

By taking expectation with respect to  $i_t$  we get:

$$\begin{aligned} & \mathbb{E}_t [D(\alpha^{t+1}) - D(\alpha^t)] \\ & \geq \sum_{i=1}^n \frac{p_i^t s_i}{n} [\phi_i^*(-\alpha_i^t) - \phi_i^*(\nabla \phi_i(A_i^\top w^t)) + A_i^\top w^t \kappa_i^t] \\ & \quad - \sum_{i=1}^n \frac{p_i^t s_i^2 |\kappa_i^t|^2 (v_i + \lambda \gamma n)}{2\lambda n^2} + \sum_{i=1}^n \frac{p_i^t \gamma s_i |\kappa_i^t|^2}{2n}. \end{aligned} \quad (6)$$

Set

$$s_i = \begin{cases} 0, & i \notin I_t \\ \theta/p_i^t, & i \in I_t \end{cases} \quad (7)$$

Then  $s_i \in [0, 1]$  for each  $i \in [n]$  and by plugging it into (6) we get:

$$\begin{aligned} & \mathbb{E}_t [D(\alpha^{t+1}) - D(\alpha^t)] \\ & \geq \frac{\theta}{n} \sum_{i \in I_t} [\phi_i^*(-\alpha_i^t) - \phi_i^*(\nabla \phi_i(A_i^\top w^t)) + A_i^\top w^t \kappa_i^t] \\ & \quad - \frac{\theta}{2\lambda n^2} \sum_{i \in I_t} \left( \frac{\theta(v_i + n\lambda\gamma)}{p_i^t} - n\lambda\gamma \right) |\kappa_i^t|^2 \end{aligned}$$

Finally note that:

$$\begin{aligned} & P(w^t) - D(\alpha^t) \\ & = \frac{1}{n} \sum_{i=1}^n [\phi_i(A_i^\top w^t) + \phi_i^*(-\alpha_i^t)] + \lambda (g(w^t) + g^*(\bar{\alpha}^t)) \\ & \stackrel{(3)}{=} \frac{1}{n} \sum_{i=1}^n [\phi_i^*(-\alpha_i^t) + \phi_i(A_i^\top w^t)] + \frac{1}{n} \langle w^t, A\alpha^t \rangle \\ & = \frac{1}{n} \sum_{i=1}^n [\phi_i^*(-\alpha_i^t) + A_i^\top w^t \nabla \phi_i(A_i^\top w^t) \\ & \quad - \phi_i^*(\nabla \phi_i(A_i^\top w^t)) + A_i^\top w^t \alpha_i^t] \\ & = \frac{1}{n} \sum_{i=1}^n [\phi_i^*(-\alpha_i^t) - \phi_i^*(\nabla \phi_i(A_i^\top w^t)) + A_i^\top w^t \kappa_i^t] \\ & = \frac{1}{n} \sum_{i \in I_t} [\phi_i^*(-\alpha_i^t) - \phi_i^*(\nabla \phi_i(A_i^\top w^t)) + A_i^\top w^t \kappa_i^t] \end{aligned}$$

□

*Proof of Lemma 4.* Note that (13) is a standard constrained maximization problem, where everything independent of  $p$  can be treated as a constant. We define the Lagrangian

$$L(p, \eta) = \theta(\kappa, p) - \eta \left( \sum_{i=1}^n p_i - 1 \right)$$

and get the following optimality conditions:

$$\begin{aligned} & \frac{|\kappa_i^t|^2 (v_i + n\lambda\gamma)}{p_i^2} = \frac{|\kappa_j^t|^2 (v_j + n\lambda\gamma)}{p_j^2}, \quad \forall i, j \in [n] \\ & \sum_{i=1}^n p_i = 1 \\ & p_i \geq 0, \quad \forall i \in [n], \end{aligned}$$

the solution of which is (14). □

*Proof of Lemma 5.* Note that in the proof of Lemma 3, the condition  $\theta \in [0, \min_{i \in I_t} p_i^t]$  is only needed to ensure that  $s_i$  defined by (7) is in  $[0, 1]$  so that (4) holds. If  $\phi_i$  is quadratic function, then (4) holds for arbitrary  $s_i \in \mathbb{R}$ . Therefore in this case we only need  $\theta$  to be positive and the same reasoning holds. □

### Additional Numerical Experiments

We now provide more numerical experiments.

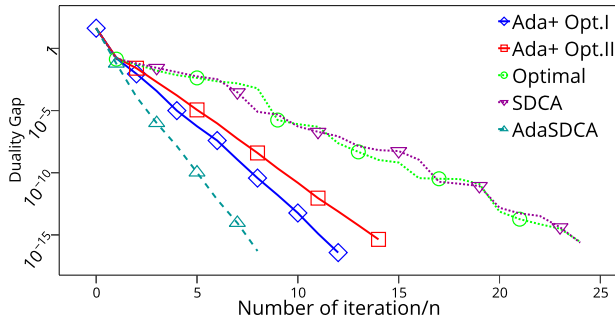

Figure 10. dorothea dataset  $d = 100000$ ,  $n = 800$ , Quadratic loss with  $L_2$  regularizer, comparing number of iterations with known algorithms

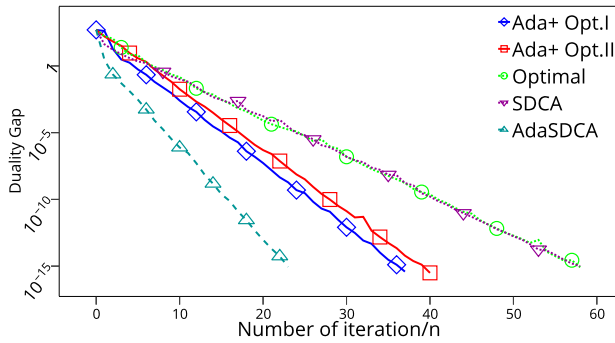

Figure 11. mushrooms dataset  $d = 112$ ,  $n = 8124$ , Quadratic loss with  $L_2$  regularizer, comparing number of iterations with known algorithms

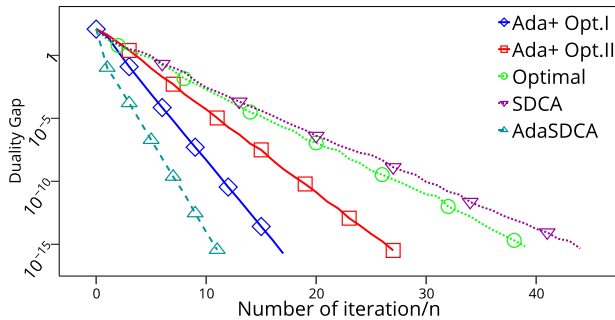

Figure 12. ijcnn1 dataset  $d = 22$ ,  $n = 49990$ , Quadratic loss with  $L_2$  regularizer, comparing number of iterations with known algorithms

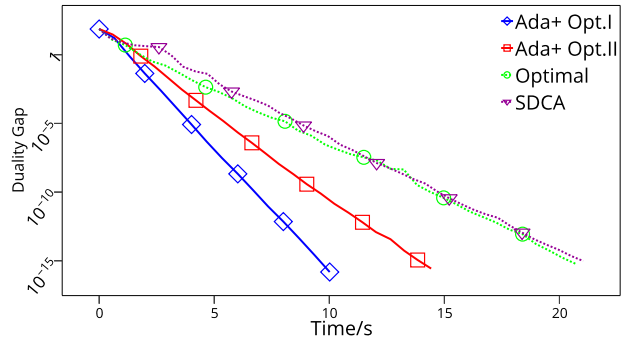

Figure 13. w8a dataset  $d = 300$ ,  $n = 49749$ , Quadratic loss with  $L_2$  regularizer, comparing real time with known algorithms

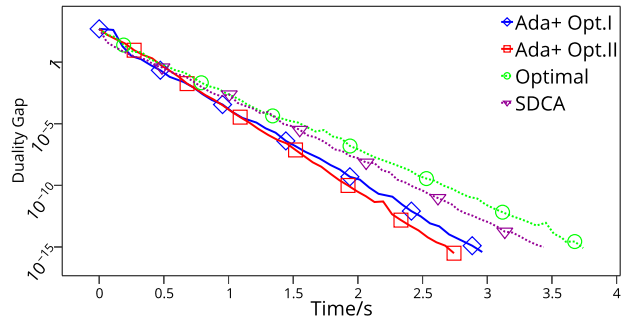

Figure 14. mushrooms dataset  $d = 112$ ,  $n = 8124$ , Quadratic loss with  $L_2$  regularizer, comparing real time with known algorithms

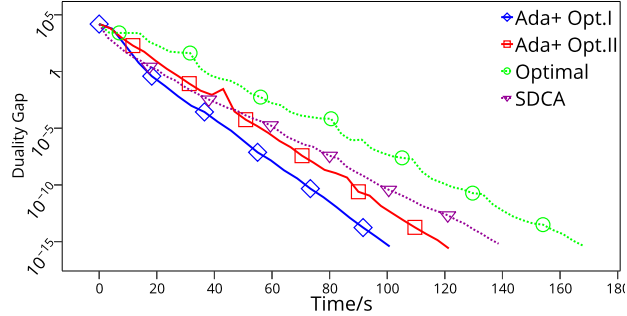

Figure 15. cov1 dataset  $d = 54$ ,  $n = 581012$ , Quadratic loss with  $L_2$  regularizer, comparing real time with known algorithms

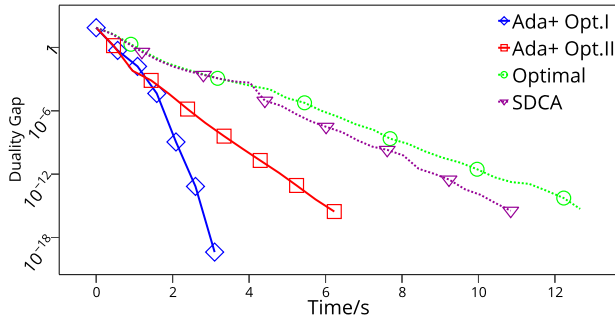

Figure 16. w8a dataset  $d = 300$ ,  $n = 49749$ , Smooth Hinge loss with  $L_2$  regularizer, comparing real time with known algorithms

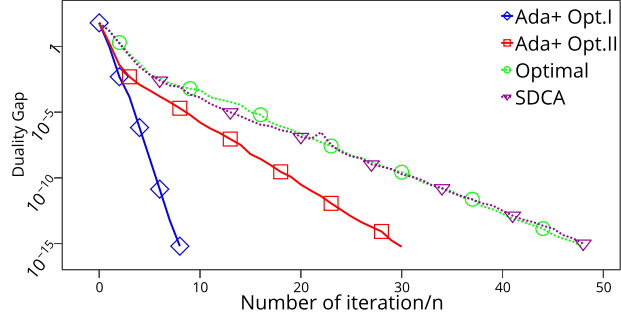

Figure 19. mushrooms dataset  $d = 112$ ,  $n = 8124$ , Smooth Hinge loss with  $L_2$  regularizer, comparing number of iterations with known algorithms

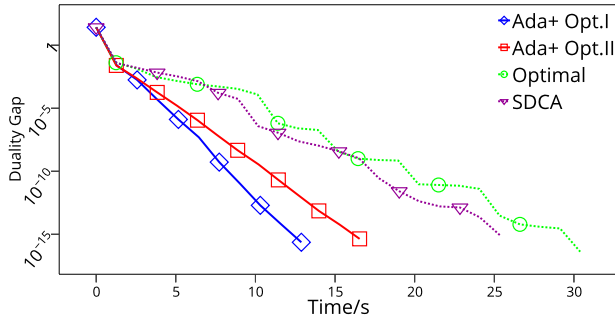

Figure 17. dorothea dataset  $d = 100000$ ,  $n = 800$ , Smooth Hinge loss with  $L_2$  regularizer, comparing real time with known algorithms

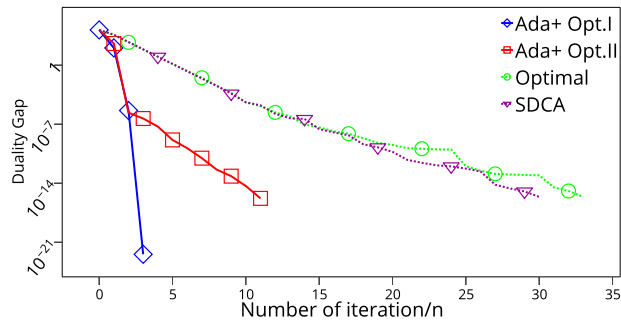

Figure 20. cov1 dataset  $d = 54$ ,  $n = 581012$ , Smooth Hinge loss with  $L_2$  regularizer, comparing number of iterations with known algorithms

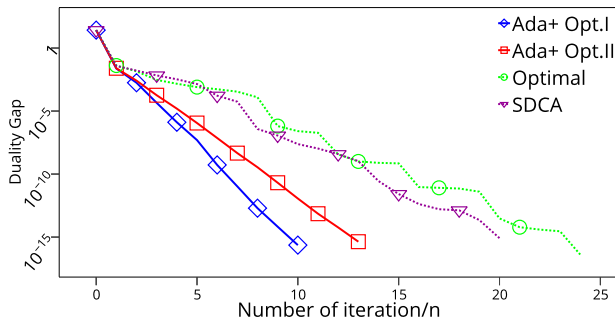

Figure 18. dorothea dataset  $d = 100000$ ,  $n = 800$ , Smooth Hinge loss with  $L_2$  regularizer, comparing number of iterations with known algorithms

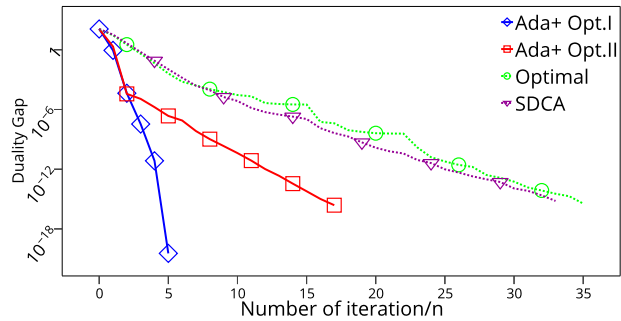

Figure 21. ijcnn1 dataset  $d = 22$ ,  $n = 49990$ , Smooth Hinge loss with  $L_2$  regularizer, comparing number of iterations with known algorithms

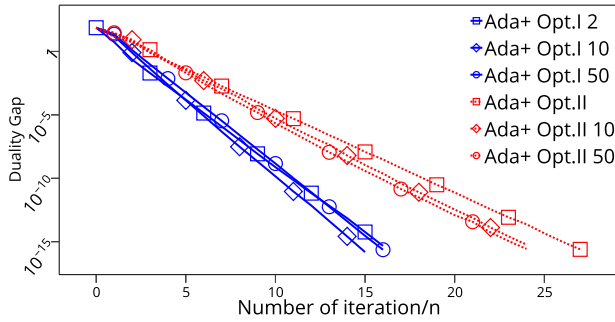

Figure 22. w8a dataset  $d = 300$ ,  $n = 49749$ , Quadratic loss with  $L_2$  regularizer, comparison of different choices of the constant  $m$

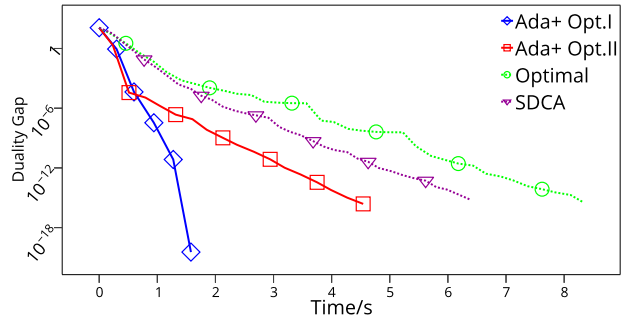

Figure 25. ijcnn1 dataset  $d = 22$ ,  $n = 49990$ , Smooth Hinge loss with  $L_2$  regularizer, comparing real time with known algorithms

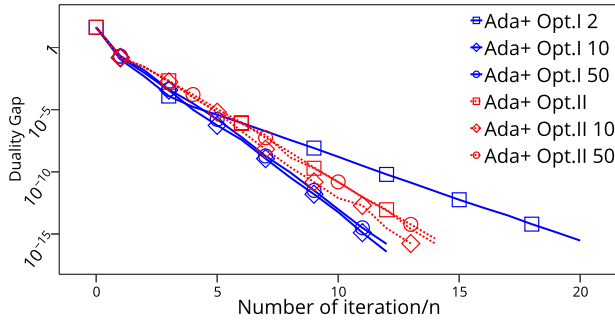

Figure 23. dorothea dataset  $d = 100000$ ,  $n = 800$ , Quadratic loss with  $L_2$  regularizer, comparison of different choices of the constant  $m$

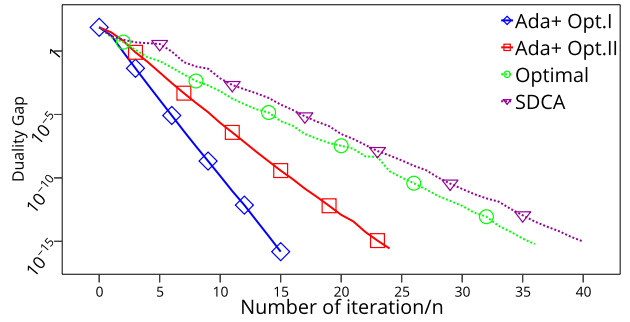

Figure 26. w8a dataset  $d = 300$ ,  $n = 49749$ , Quadratic loss with  $L_2$  regularizer, comparing number of iterations with known algorithms

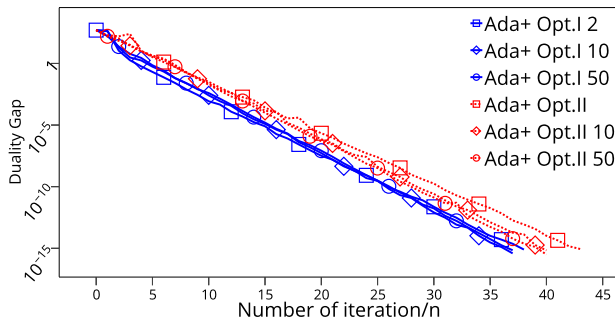

Figure 24. mushrooms dataset  $d = 112$ ,  $n = 8124$ , Quadratic loss with  $L_2$  regularizer, comparison of different choices of the constant  $m$

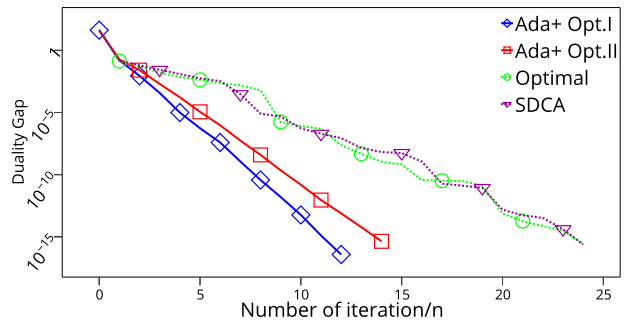

Figure 27. dorothea dataset  $d = 100000$ ,  $n = 800$ , Quadratic loss with  $L_2$  regularizer, comparing number of iterations with known algorithms

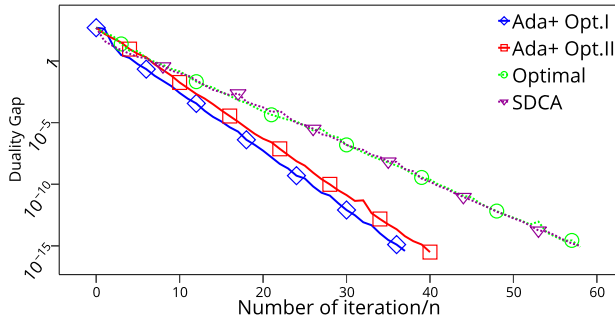

Figure 28. mushrooms dataset  $d = 112$ ,  $n = 8124$ , Quadratic loss with  $L_2$  regularizer, comparing number of iterations with known algorithms

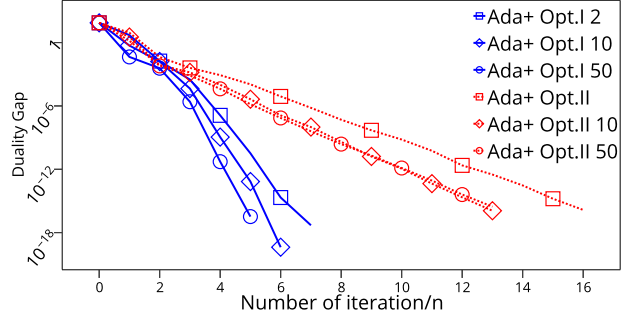

Figure 31. w8a dataset  $d = 300$ ,  $n = 49749$ , Smooth Hinge loss with  $L_2$  regularizer, comparison of different choices of the constant  $m$

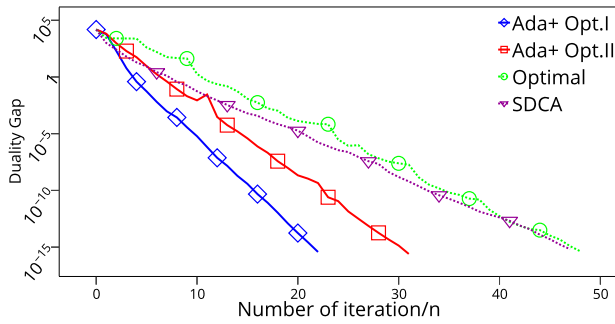

Figure 29. cov1 dataset  $d = 54$ ,  $n = 581012$ , Quadratic loss with  $L_2$  regularizer, comparing number of iterations with known algorithms

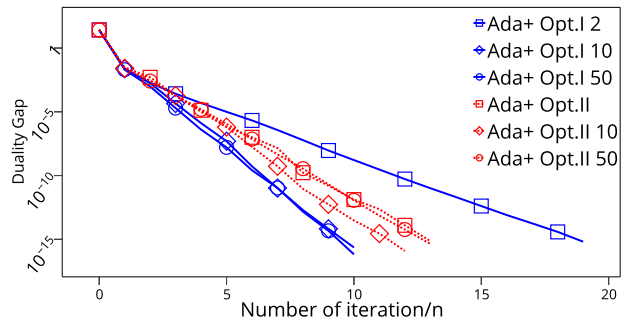

Figure 32. dorothea dataset  $d = 100000$ ,  $n = 800$ , Smooth Hinge loss with  $L_2$  regularizer, comparison of different choices of the constant  $m$

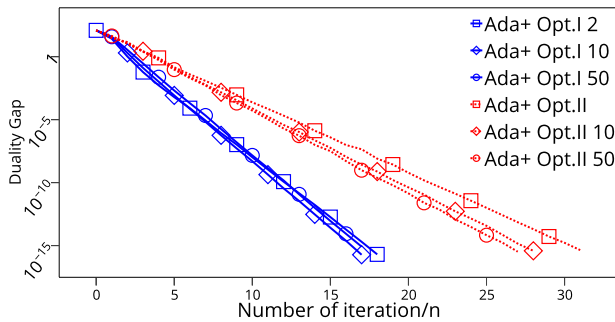

Figure 30. ijcnn1 dataset  $d = 22$ ,  $n = 49990$ , Quadratic loss with  $L_2$  regularizer, comparison of different choices of the constant  $m$

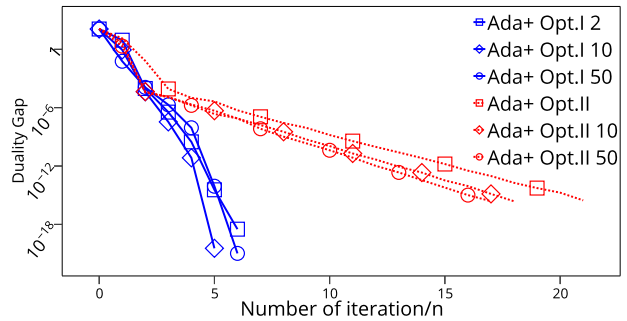

Figure 33. ijcnn1 dataset  $d = 22$ ,  $n = 49990$ , Smooth Hinge loss with  $L_2$  regularizer, comparison of different choices of the constant  $m$
